# Supplementary material for: The marine reservoir age of Greenland coastal waters
Source: Copernicus journal article supplement (doi:10.5194/gchron-5-451-2023), 2023-12-19
Supplement: Supplementary file 1 [file gchron-5-451-2023-supplement.zip]

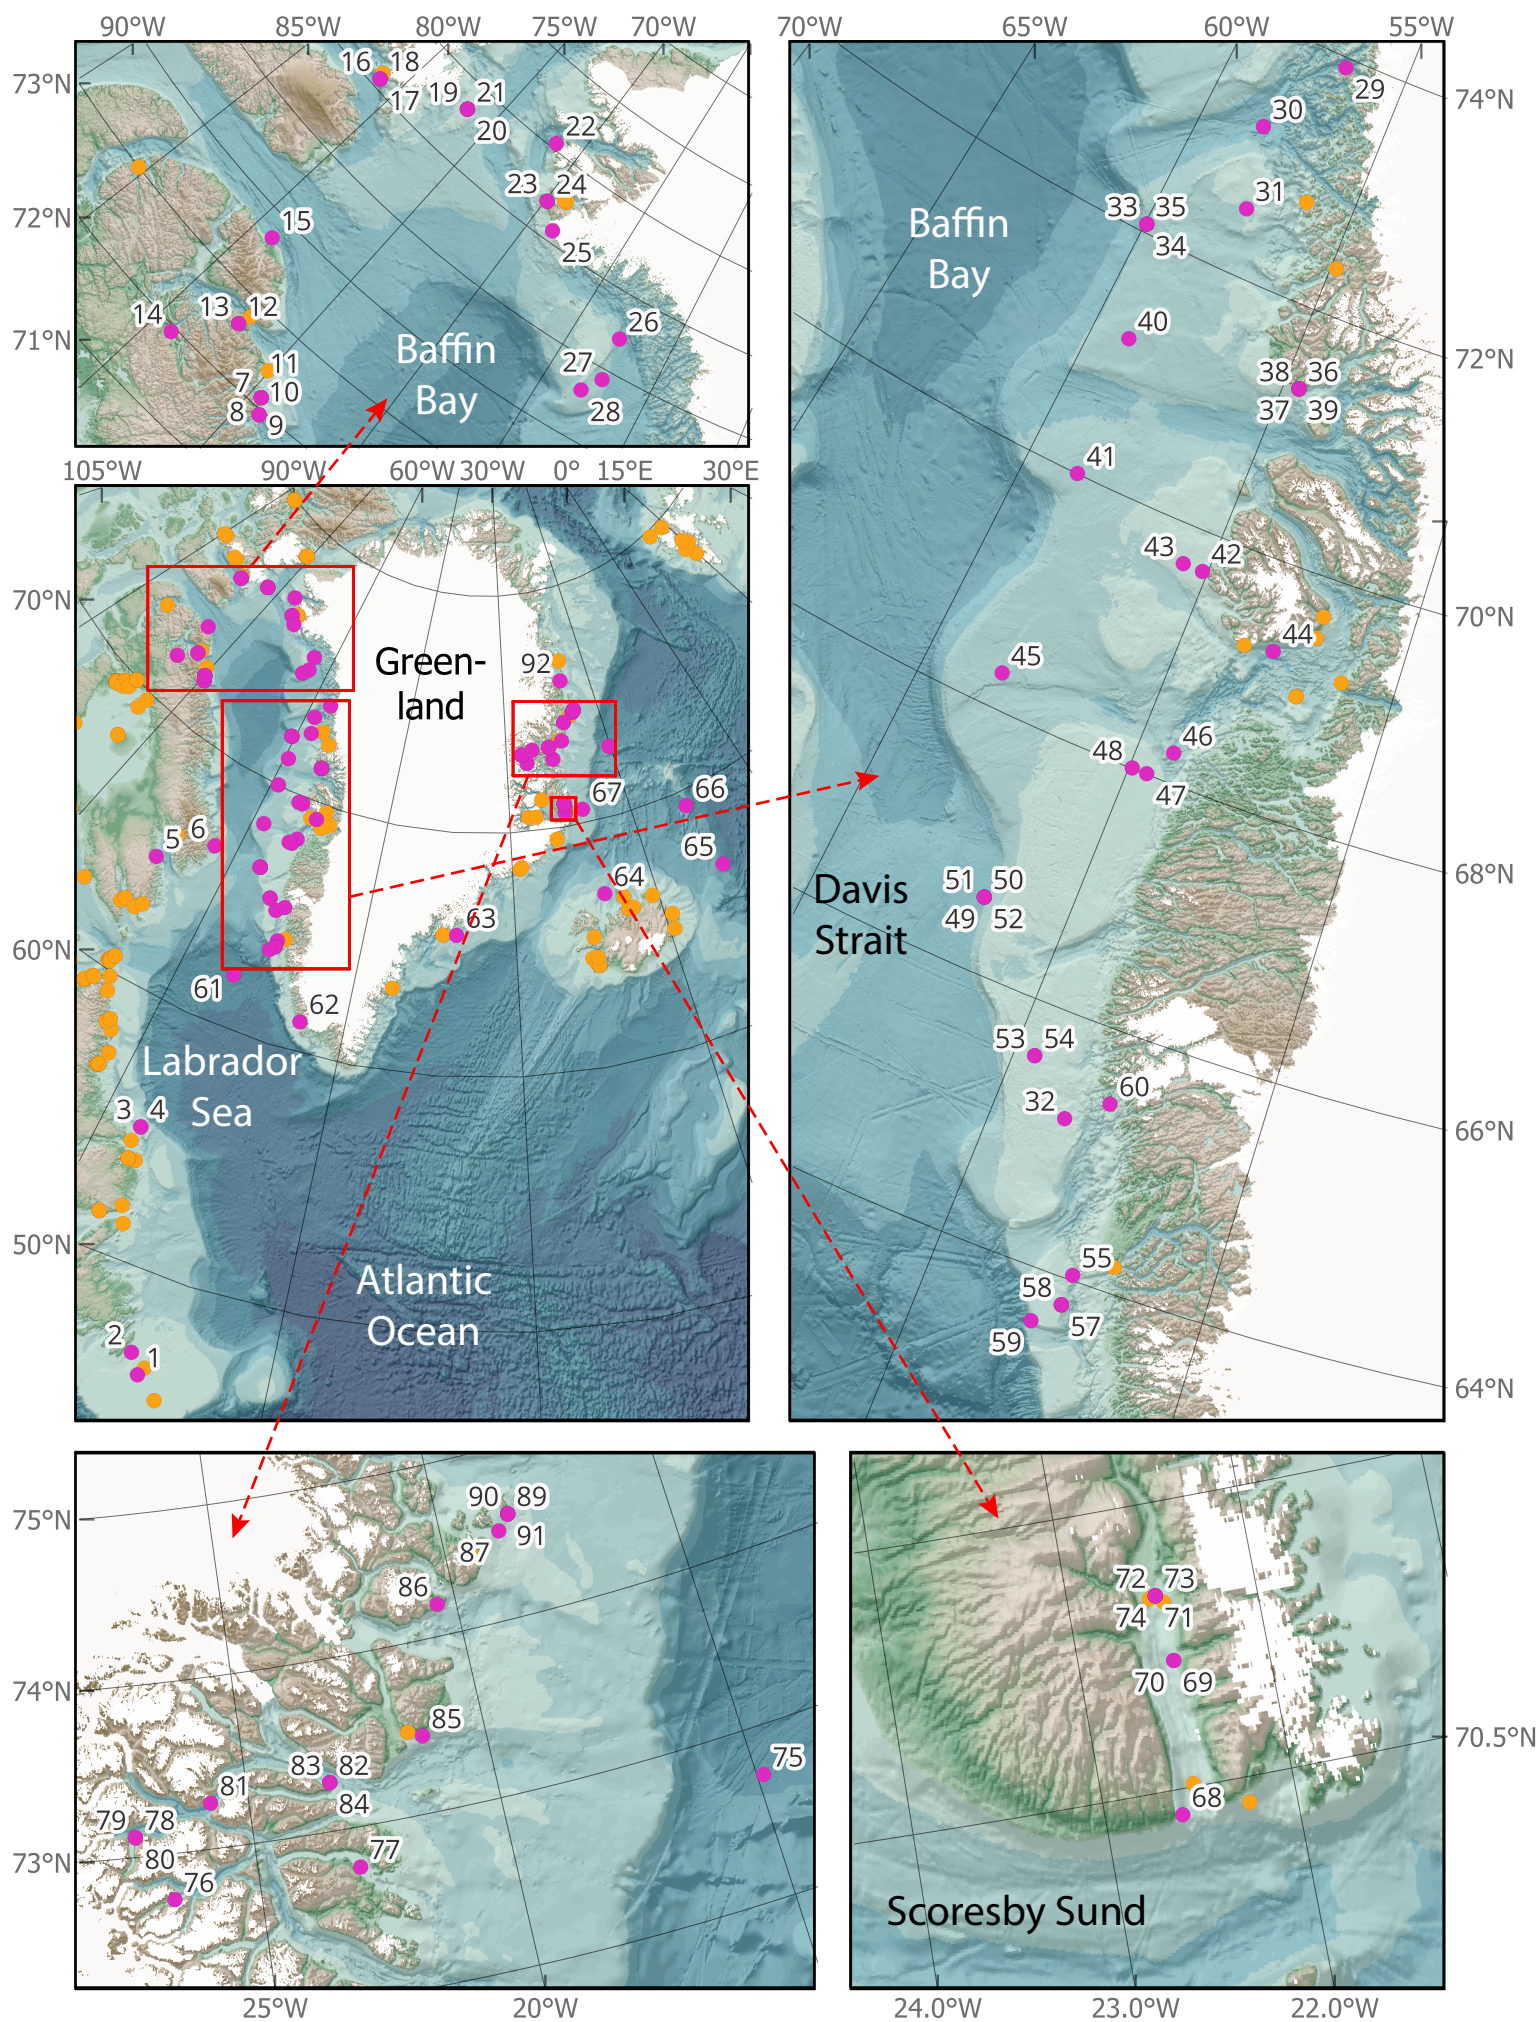

Figure S1. Overview map (mid left) of all samples with close-up maps of areas with high sample density. All new data points are numbered in accordance with Table S1. Bathymetry is from GEBCO (GEBCO Bathymetric Compilation Group, 2022).
