# Supplementary material for: The marine reservoir age of Greenland coastal waters
Source: Copernicus journal article supplement (doi:10.5194/gchron-5-451-2023), 2023-12-19
Supplement: Supplementary file 2 [file gchron-5-451-2023-supplement.zip]

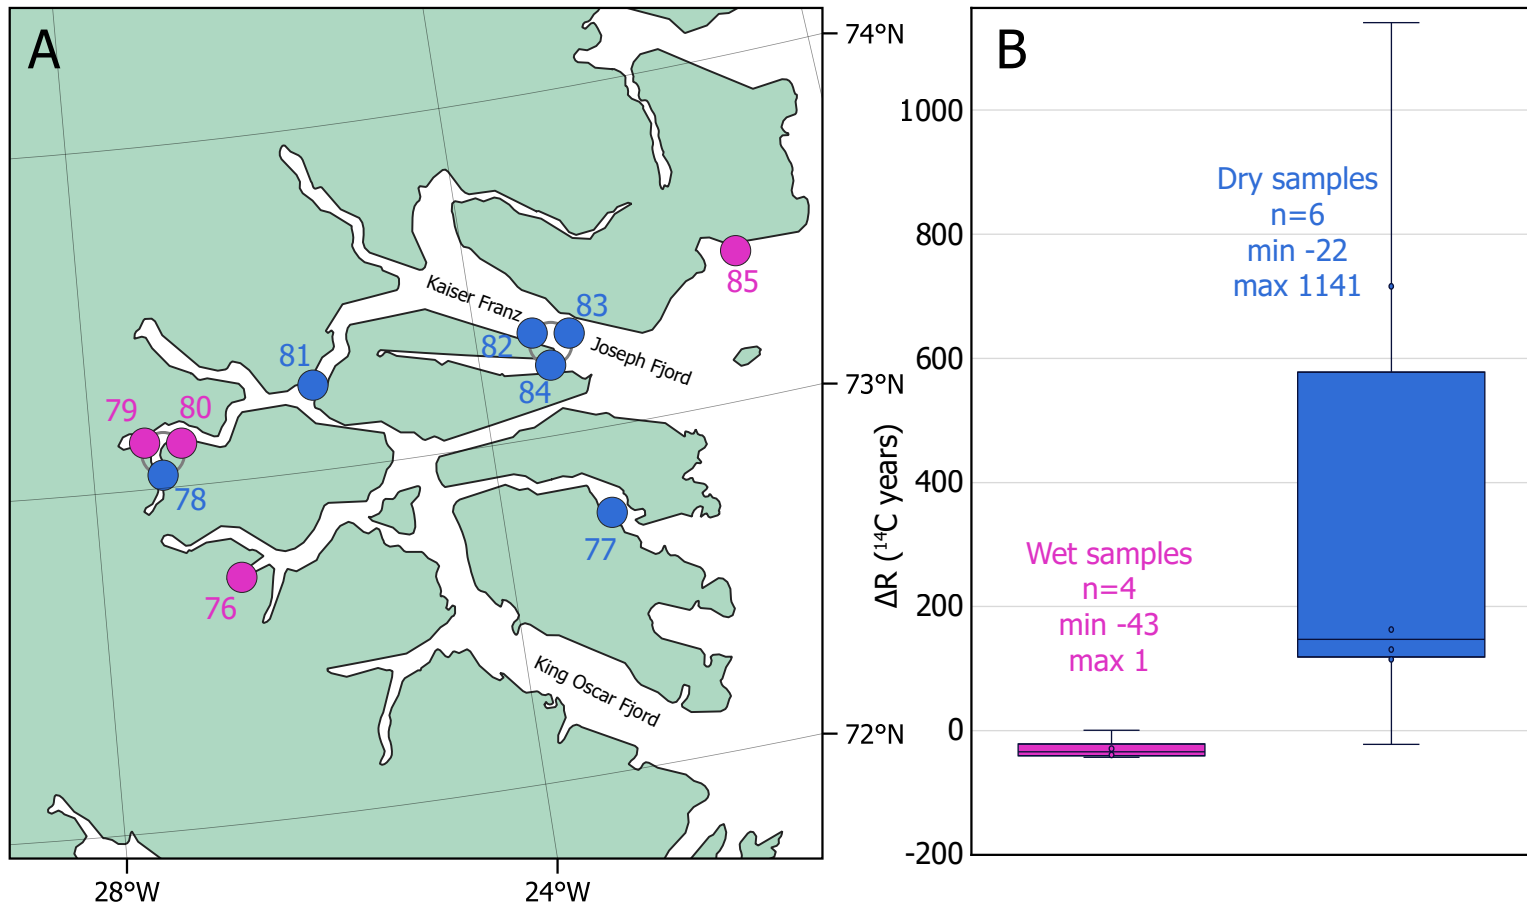

Figure S2. A: Map of Kaiser Franz Josef Fjord and King Oscar Fjord in East Greenland, showing the sample locations of wet (pink) and dry (blue) mollusk samples. Samples are numbered according to Table S1. B: Comparison of  $\Delta R$  values between wet and dry samples from the same region.
