# Supplementary material for: The marine reservoir age of Greenland coastal waters
Source: Copernicus journal article supplement (doi:10.5194/gchron-5-451-2023), 2023-12-19
Supplement: Supplementary file 3 [file gchron-5-451-2023-supplement.zip]

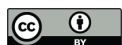

## *Supplement of*

# **The marine reservoir age of Greenland coastal waters**

**Christof Pearce et al.**

*Correspondence to:* Christof Pearce ([christof.pearce@geo.au.dk](mailto:christof.pearce@geo.au.dk))

- [gchron-5-451-2023-supplement-title-page.pdf](#)
- [Figure S1.pdf](#)
- [Figure S2.pdf](#)
- [Table S1.xlsx](#)

The copyright of individual parts of the supplement might differ from the article licence.
