# Supplementary material for: The marine reservoir age of Greenland coastal waters
Source: Copernicus journal article supplement (doi:10.5194/gchron-5-451-2023), 2023-12-19
Supplement: Supplementary file 4 [file gchron-5-451-2023-supplement.zip]

Archive with 4 entries (4 files):
- gchron-5-451-2023-supplement-title-page.pdf
- Table S1.xlsx
- Figure S1.pdf
- Figure S2.pdf
